# Supplementary material for: An in situ FTIR study of the plasma- and thermally-driven reaction of isopropyl alcohol at CeO2: evidence for a loose transition state involving Ce3+?
Source: Royal Society of Chemistry journal article supplement (doi:10.1039/c8cp05983g), 2018-12-19
Supplement: c8cp05983g1.pdf [file c8cp05983g1.pdf]

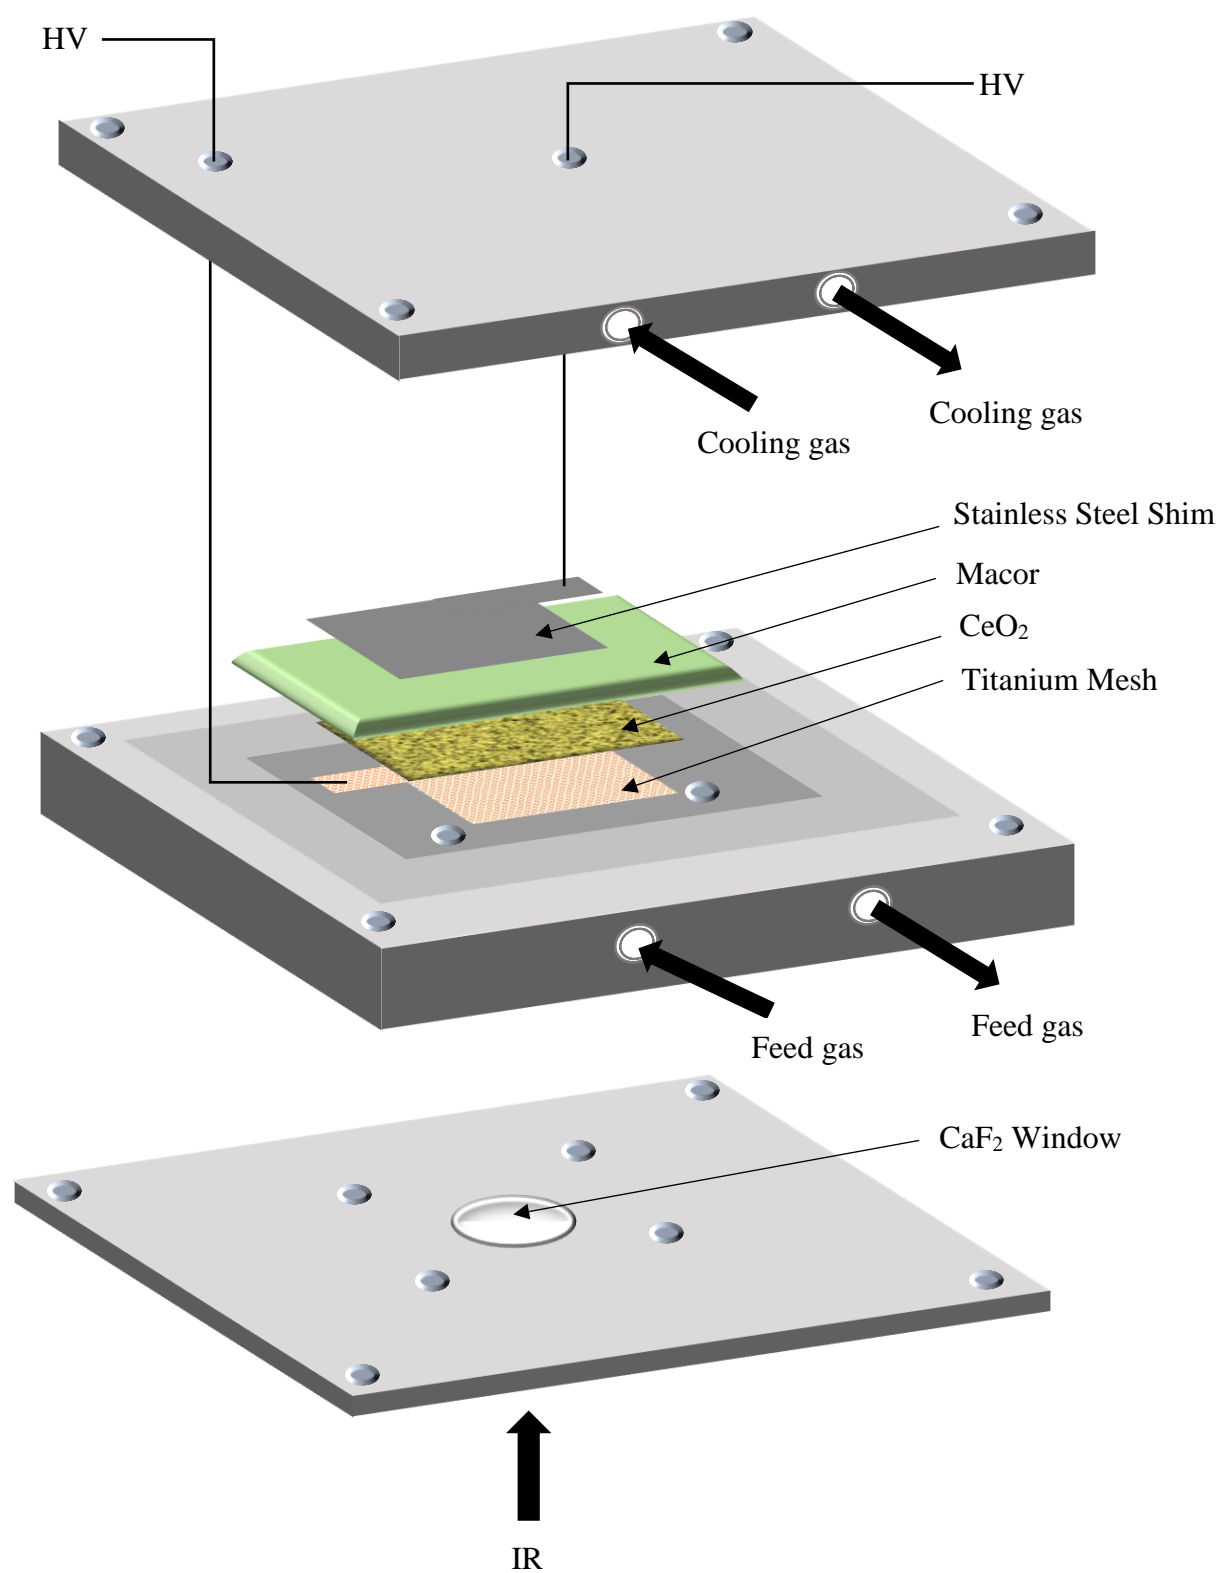

Figure S1. Schematic of the reflectance cell

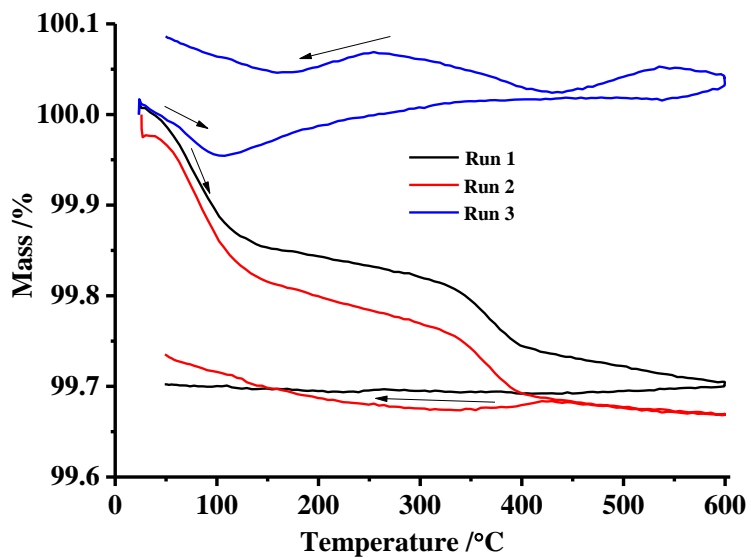

(a)

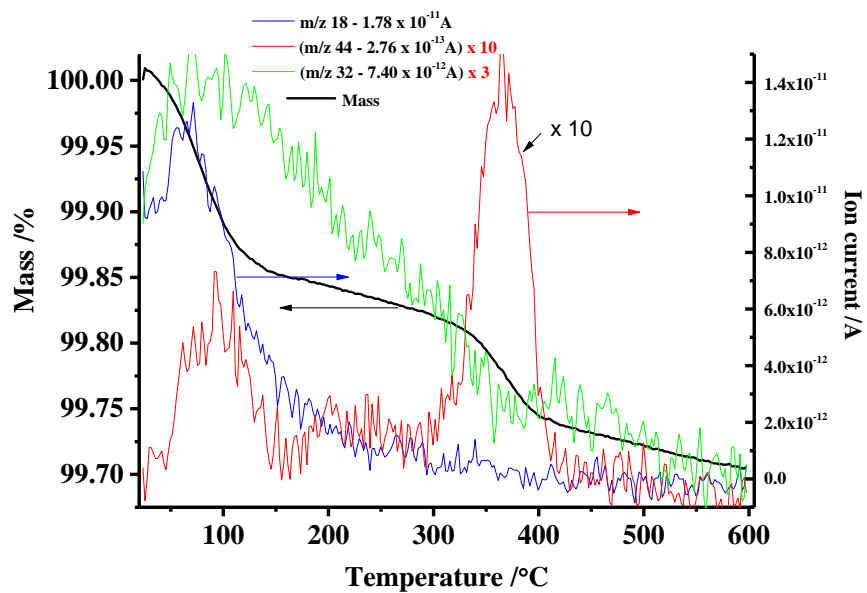

(b)

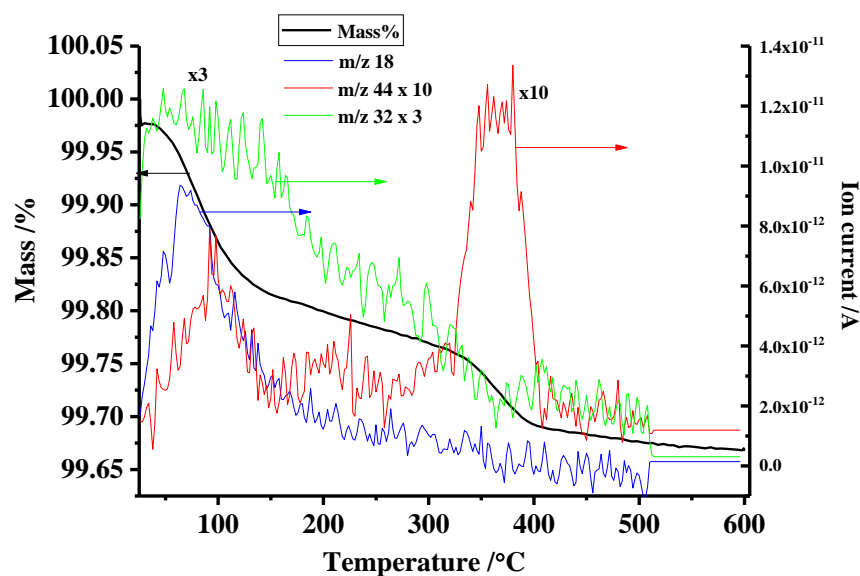

(c)

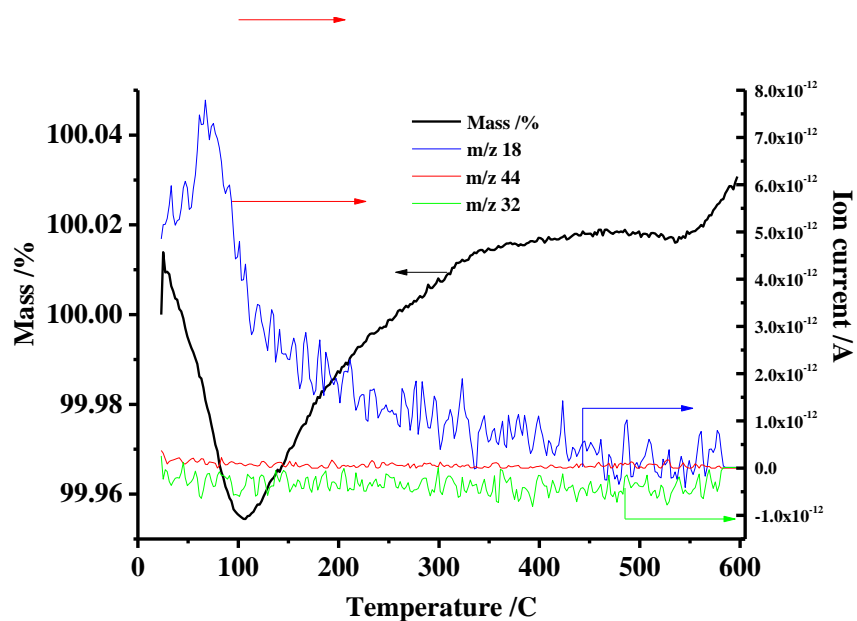

(d)

Figure S2. (a) The thermogravimetric response of 55.5 mg of  $\text{CeO}_2$ , heated in  $40 \text{ cm}^3 \text{ min}^{-1}$  flowing  $\text{N}_2$  at  $5^\circ\text{C min}^{-1}$  from room temperature to  $600^\circ\text{C}$  (Run 1). The sample was held at  $600^\circ\text{C}$  for 10 minutes and then cooled at  $5^\circ\text{C min}^{-1}$  to room temperature. (b) & (c) The  $m/z = 18, 32$  and  $44$  responses recorded during the first and second heating cycles (Runs 1 and 2, respectively) of the sample in (a): the  $m/z = 32$  responses are enhanced by a factor of 3 and the  $m/z = 44$  responses by a factor of 10. (d) The  $m/z = 18, 32$  and  $44$  responses recorded during the third heating of the sample in (a), Run 3. Run 1 was carried out on day 1 and the sample left in air overnight. Run 2 was carried out on day 2 and the sample left in flowing nitrogen overnight and run 3 carried out the following day.

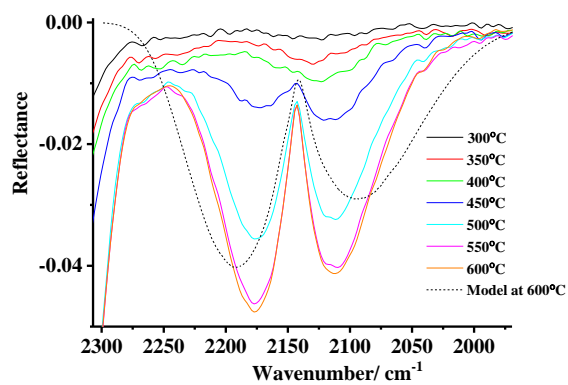

Figure S3. Spectra showing the CO spectral region collected at temperatures  $> 300^{\circ}\text{C}$  from sample D2 during the experiment depicted in Figs. 3(a) – (d) with the spectrum collected at  $300^{\circ}\text{C}$  subtracted. Also shown is the spectrum of CO at  $600^{\circ}\text{C}$  modelled using Spectralcalc, see text for details.

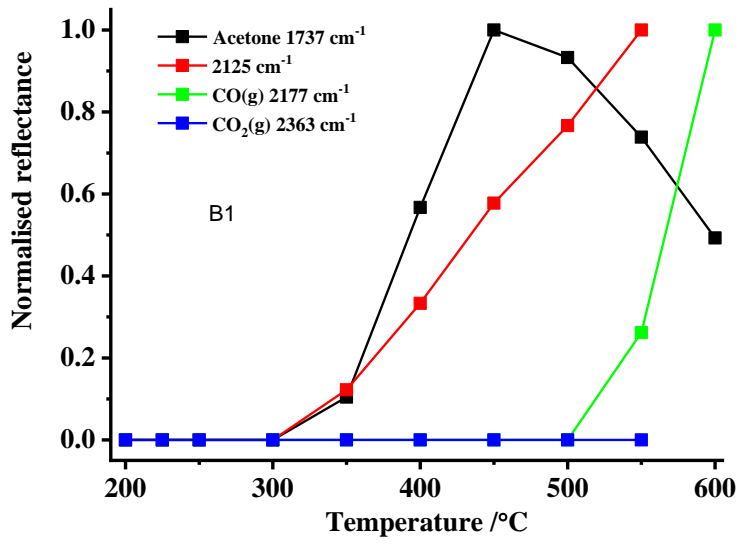

(a)

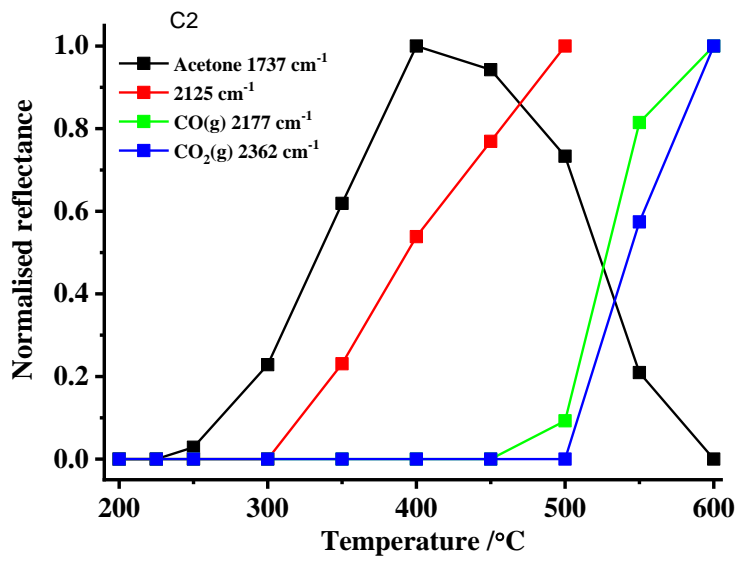

(b)

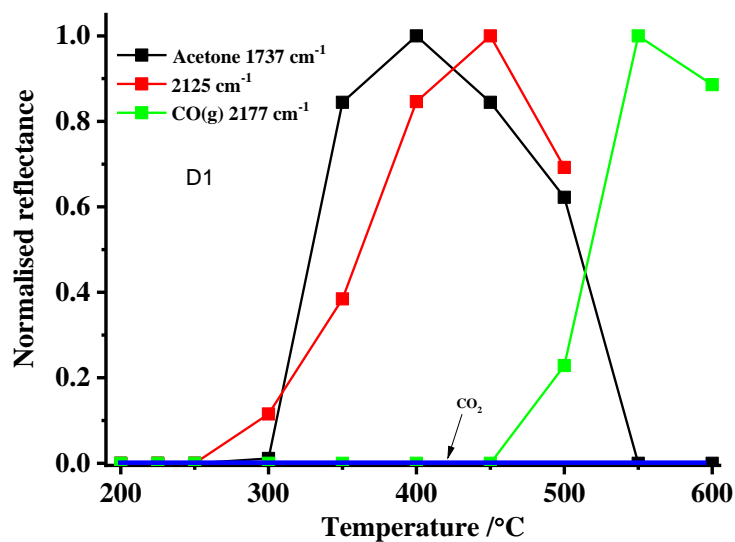

(c)

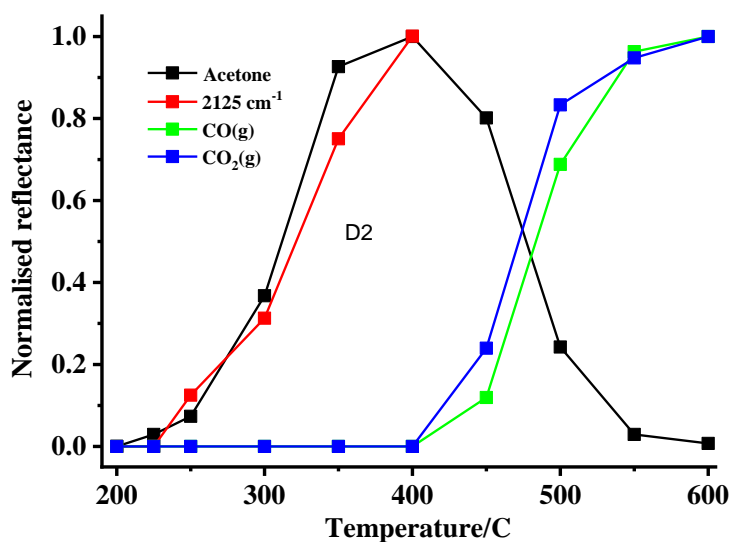

(d)

Figure S4. The plots in Figs. 4(a) – (d) normalised to their maximum values and plotted according to sample.

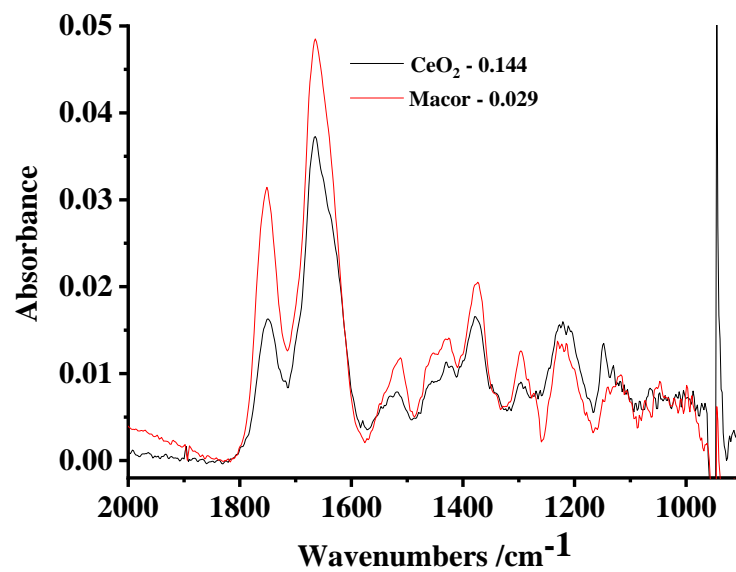

(a)

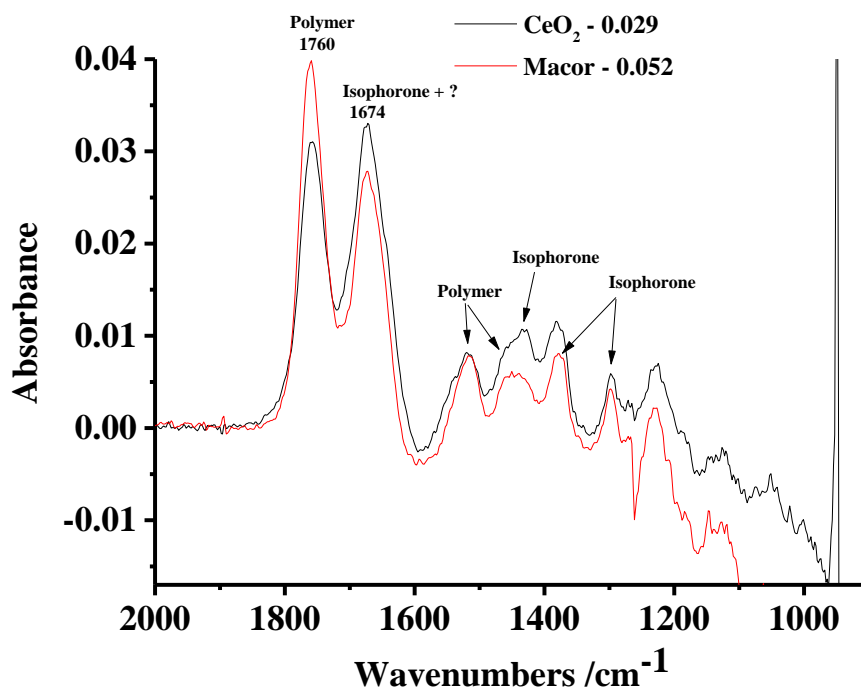

(b)

Figure S5. Spectra collected (a) after 8 minutes and (b) after 20 minutes during experiments carried out at 16W input power and using a nitrogen+IPA feed at a total flow rate of  $30 \text{ cm}^3 \text{ min}^{-1}$  with  $\text{CeO}_2$  or Macor as the dielectric in the plasma reflectance cell. In (a) the analogous spectra collected after 1 minute were subtracted, and in (b) the spectra collected after 8 minutes were subtracted. The spectra were offset down as indicated to facilitate comparison.

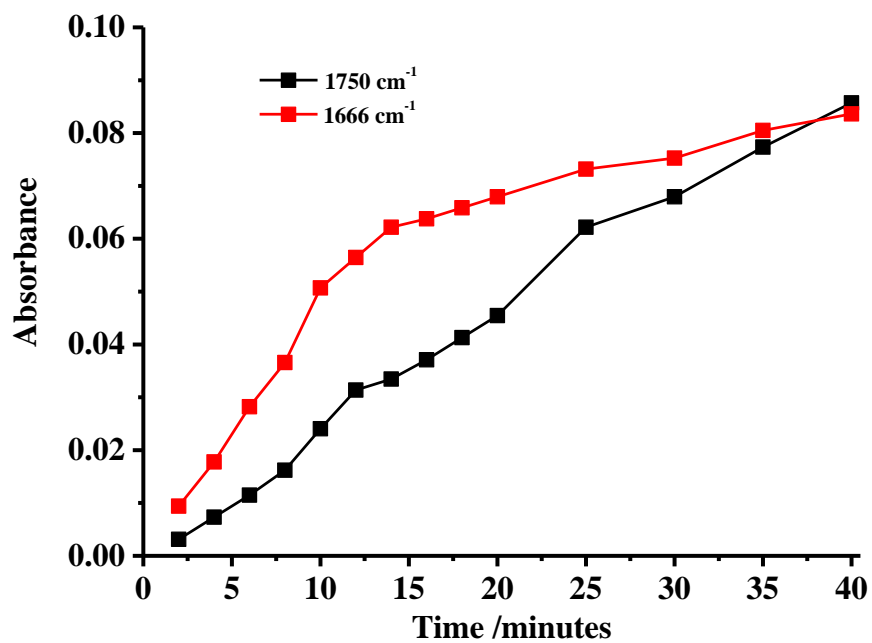

Figure S6. Plots of the 1750 and 1666 cm<sup>-1</sup> bands in Fig. 5 as a function of time.
